## 1 **Time-resolved cryoEM using Spotiton**

---

2  
3 Venkata P. Dandey\*<sup>1</sup>, William C. Budell\*<sup>1</sup>, Hui Wei<sup>1</sup>, Daija Bobe<sup>1</sup>, Kashyap Maruthi<sup>1</sup>,  
4 Mykhailo Kopylov<sup>1</sup>, Edward Eng<sup>1</sup>, Peter A. Kahn<sup>2</sup>, Jenny E. Hinshaw<sup>3</sup>, Nidhi Kundu<sup>3</sup>,  
5 Crina M. Nimigean<sup>4</sup>, Chen Fan<sup>4</sup>, Nattakan Sukomon<sup>4</sup>, Seth Darst<sup>5</sup>, Ruth Saecker<sup>5</sup>,  
6 James Chen<sup>5</sup>, Brandon Malone<sup>5</sup>, Clinton S. Potter<sup>1,6</sup>, Bridget Carragher<sup>1,6</sup>.

7  
8 \* These authors contributed equally.

9 <sup>1</sup> The National Resource for Automated Molecular Microscopy, Simons Electron  
10 Microscopy Center, New York Structural Biology Center, 89 Convent Ave, New York,  
11 NY, 10027, USA.

12 <sup>2</sup> Engineering Arts LLC, Arizona, USA

13 <sup>3</sup> Laboratory of Cell and Molecular Biology, National Institute of Diabetes and Digestive  
14 and Kidney Diseases, NIH, Bethesda, MD, 20892, USA.

15 <sup>4</sup> Department of Anesthesiology, Weill Cornell Medical College, New York, NY, 10065,  
16 USA

17 <sup>5</sup> Laboratory of Molecular Biophysics, The Rockefeller University, New York, NY 10065,  
18 USA.

19 <sup>6</sup> Department of Biochemistry and Molecular Biophysics, Columbia University, New  
20 York, NY 10032, USA.

21  
22 *For correspondence:* Bridget Carragher ([bcarr@nysbc.org](mailto:bcarr@nysbc.org))

23  
24 **Short Title: Time-resolved cryoEM using Spotiton**

25  
26 **Keywords:** time-resolved, short-lived molecular states, cryoEM vitrification, piezo  
27 dispensing, nanowire grids.

28 **Abstract**

29 We present an approach for preparing cryoEM grids to study short-lived molecular states.  
30 Using piezo electric dispensing, two independent streams of ~50 pL sample drops are  
31 deposited within 10 ms of each other onto a nanowire EM grid surface, and the mixing  
32 reaction stops when the grid is vitrified in liquid ethane, on the order of ~100 ms later. We  
33 demonstrate the utility of this approach for four biological systems where short-lived  
34 states are of high interest.

35 Cryo electron microscopy (cryoEM) has the distinct advantage of being able to capture a  
36 wide variety of conformational states of macromolecules in solution. Changes in  
37 conformational states can be triggered by a variety of biological reactions. For example,  
38 by adding a ligand to an enzyme, mixing together components of a multimolecular  
39 machine, or by adding energy in the form of ATP or GTP. These conformational changes  
40 are often transient but can be trapped by vitrification of the sample at specific time points  
41 following the initiation of the reaction and then imaged using electron microscopy, a  
42 process which has been loosely referred to as “time-resolved cryoEM”<sup>1</sup> when applied to  
43 the study of a conformational process occurring on the millisecond time scale. For much  
44 slower processes, standard vitrification or negative staining at fixed time points (on the  
45 order of seconds to minutes) serves the same goal<sup>2 3</sup>.

46 Possibly the earliest approach to time-resolved cryoEM was by Berriman and Unwin<sup>4</sup>  
47 where one reactant in the form of small droplets was sprayed onto another in the form of  
48 a thin aqueous film supported by an EM grid substrate. Fast timing was achieved by  
49 locating the sprayer just above the cryogen cup into which the grid was plunged - thereby  
50 stopping the reaction - and by spraying onto a grid that was already moving at high speed  
51 towards the cryogen. The potential of this approach to reveal conformational changes  
52 induced by ligands on fast-acting molecules, such as ion channels, was demonstrated by  
53 high-resolution images obtained of acetylcholine receptor tubes onto which acetylcholine  
54 had been sprayed<sup>5</sup>. A little later, the group of Howard White described an updated  
55 computer-controlled device and demonstrated its efficacy in observing the interaction of  
56 myosin sprayed onto actin tubes<sup>6</sup>. The method is generally described as “spraying-  
57 mixing” and can achieve time resolutions as low as 2 ms<sup>7</sup>. A disadvantage of this  
58 approach is that mixing is not uniform across the grid and in order to identify specific areas  
59 where the sprayed droplets mix with the standing solution, some kind of fiducial marker  
60 must be present in the sprayed solution. In another approach to time-resolved cryoEM,  
61 conformational changes in the proton pump bacteriorhodopsin were observed by  
62 exposing crystals of bacteriorhodopsin, sitting on an EM grid, to variable periods of light  
63 illumination followed by rapid freezing in liquid ethane<sup>8</sup>. This method also provides  
64 millisecond control over the timing between the light-induced action and the trapped  
65 conformational state but is only suitable for photo-active samples.

66 While these methods engendered a lot of interest, difficulties with practical  
67 implementation resulted in very few further publications using time-resolved cryoEM until  
68 more recently, when an alternative “mixing-spraying” approach was developed by the  
69 group of Joachim Frank<sup>9,10</sup>. Their device was based on the design described by Howard  
70 White<sup>11</sup>, but mixed the two samples prior to spraying small droplets of the mixture onto a  
71 dry grid plunging rapidly towards a cryogen. Mixing and spraying were achieved using a  
72 microfabricated device that enabled very fast mixing, using chaotic advection<sup>12</sup>, followed  
73 by a fixed reaction chamber length to control the reaction time prior to pneumatic spraying.  
74 The system has been used in a variety of time-resolved experiments to study the  
75 mechanics of ribosomes<sup>13 14 15 16</sup> and is capable of reaction times of as low as ~10 ms. A  
76 recent paper<sup>17</sup> described an update that allows for either mixing-spraying or spraying-  
77 mixing. Applying this approach to proteins other than the ribosome may present

78 difficulties, including the need for a fairly large (~30  $\mu$ L) volume of protein sample for each  
79 grid. In addition, the thickness of the vitreous ice layer varies with droplet size and the  
80 spreading of the droplet on the grid, potentially reducing the efficiency of data collection.

81 We have developed a new approach to the spraying-mixing method based on the  
82 Spotiton robot<sup>18 19</sup> that uses a piezo dispensing tip to apply a stream of ~50 pL droplets  
83 onto a nanowire (“self-wicking”) grid<sup>20</sup> as it rapidly speeds past on its way to vitrification  
84 in a liquid cryogen. This method produces a stripe of ice of fairly uniform thickness across  
85 each grid, which is often sufficient to acquire enough data for a high-resolution map. The  
86 fast spot-to-plunge time also has some value in ameliorating the deleterious effects of the  
87 air-water interface and has been used to prepare grids for a wide variety of protein  
88 samples<sup>21-26</sup>. By adding a second piezo dispensing tip to the device, we can deliver a  
89 second stream of droplets onto the first stream within 10 ms of it being deposited. The  
90 two sample volumes mix on the grid as the bulk volume is wicked away and spread out  
91 to a thin film by the capillary action of the nanowires. We describe the method and  
92 demonstrate its efficacy and value for four biological systems where short-lived states are  
93 of high interest: (i) binding of ribosomal subunits; (ii) binding of promoter DNA to RNA  
94 polymerase; (iii) binding of Ca<sup>2+</sup> to a potassium channel followed by a conformational  
95 change; (iv) conformational rearrangements of dynamin lipid tubes driven by GTP  
96 hydrolysis.

97 Volumes on the order of 50 pL have been shown to mix completely within ~10 ms when  
98 brought together in mid-air just before colliding with a surface<sup>27</sup> and thus good mixing of  
99 the drops on the nanowire surface is expected. Nevertheless, as a first proof of principle  
100 to validate the basic operation of time-resolved Spotiton, we mixed two abundantly  
101 available, well behaved, and well understood test samples, apoferritin and 70S  
102 ribosomes. As shown in Figure 1, we dispensed the two samples (Table S5) onto the  
103 grid by setting the second stream of sample droplets to be initially overlapping the first  
104 stream at the leading edge of the grid and then separated from it by 1-3 squares towards  
105 the end of sample deposition nearer the grid’s trailing edge. In this way, we are able to  
106 provide the unmixed control experiments at the same time as the mixed. As observed in  
107 the images in Figure 1, in the non-overlapping regions we see apoferritin and 70S  
108 ribosomes in high concentrations and well distributed in the vitreous ice of the individual  
109 separated stripes, whereas in the overlapping area, we observe both particles well mixed.

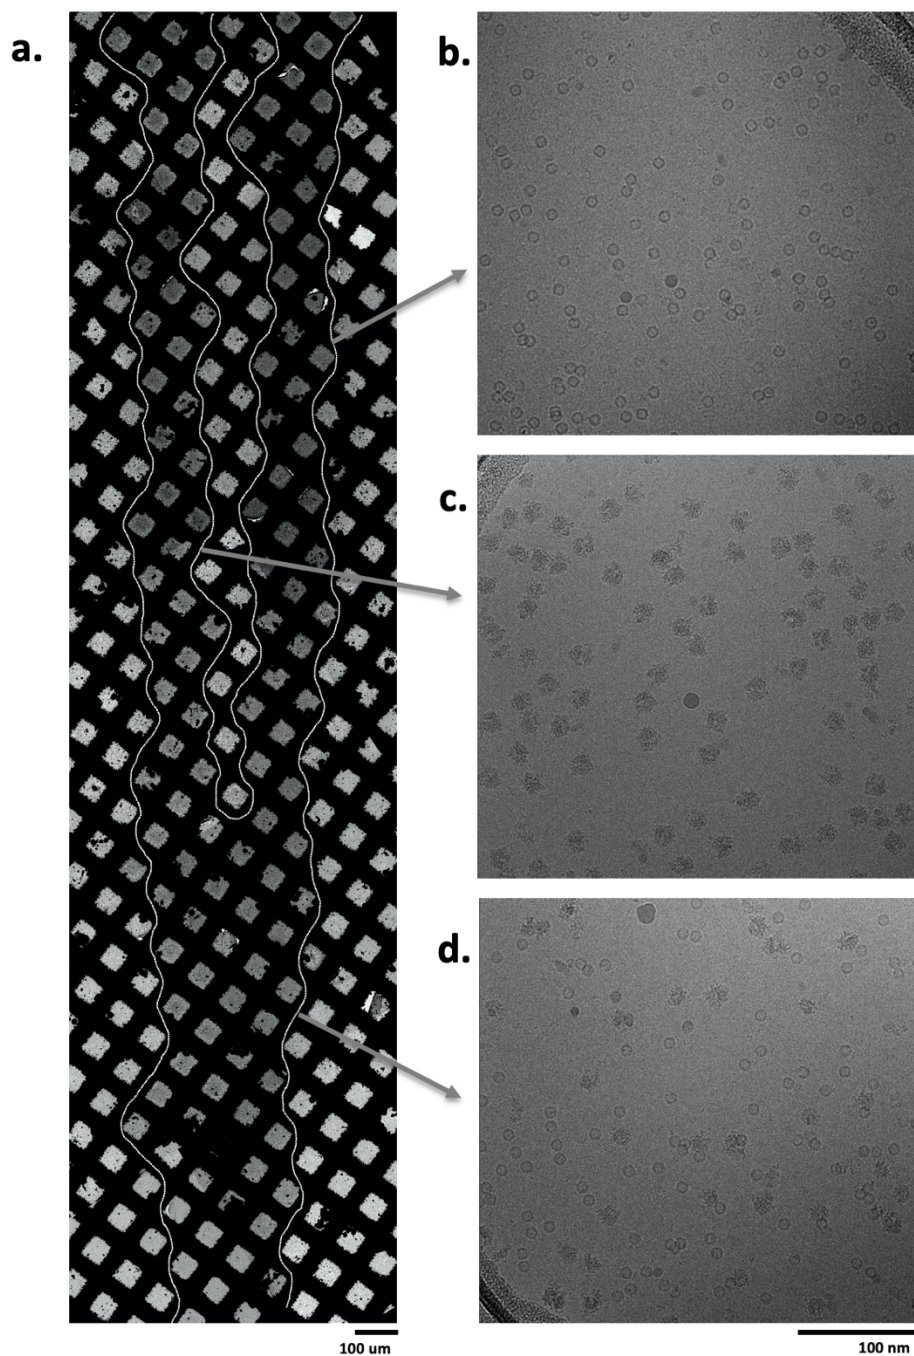

**Figure 1:** Apoferritin and 70S ribosomes were used as a proof of concept to illustrate mixing on the nanowire grids. (a) Overview of the vitrified grid showing the sample streams merged at the leading edge (bottom) and separated at the trailing edge (top). Squares containing vitrified ice are indicated by a white outline. Example micrographs obtained from the indicated regions show either only (b) apoferritin or (c) 70S ribosomes or (d) a mix of both samples.

111 Early work on mixing-spraying demonstrated that separated 30S and 50S ribosomal  
112 subunits could associate into 70S ribosomes<sup>10</sup>. In Figure 2a we show an example of an  
113 image of the overlapping area of grid where these two sample have been mixed. Control  
114 experiments of the individual samples showed populations of 30S or 50S subunits (plus  
115 a small percentage of 50S dimer particles), and no evidence of 70S complexes (Figure  
116 S2c, d). The mixed sample contained 30S, 50S, 50S dimers plus about 20% assembled  
117 70S ribosomes (Figure 2a); this particle count was estimated by picking all particles in the  
118 field of view and then sorting in 2D and 3D to arrive at a reconstructed map of the 70S  
119 ribosome at a resolution of 4.8 Å (Figure S2a,b). We note that previous work<sup>14</sup> observed  
120 ~40% assembled 70S ribosomes using a mixing-spraying device followed by a 140 ms  
121 delay in a reaction chamber. This difference in assembly states is not surprising as the  
122 rate of interactions between subunits is expected to be much slower via diffusion within  
123 droplets that mix on the grid than by the mixing that occurs by chaotic advection in the  
124 device described in the earlier study. We also note that the previous study used a higher  
125 concentration of 30S subunits, twice that of 50S subunits, whereas the data shown here  
126 used a 1:1 ratio of 30S to 50S subunits.

127  
128 An obviously compelling use of time-resolved cryoEM is to observe changes in an ion  
129 channel during the early stages of its interaction with a ligand. We examined the  
130 conformational changes in a calcium-gated potassium channel (MthK<sup>28-30</sup>) upon  
131 interacting with calcium ions. When reconstituted into liposomes, MthK was observed to  
132 activate within milliseconds after application of saturating Ca<sup>2+</sup> concentrations and then  
133 to inactivate slowly with a time constant of ~2 s<sup>39</sup>. This slow inactivation is caused by the  
134 17 N-terminal amino acids entering the pore from the intracellular side and obstructing  
135 ion permeation in a ball-and-chain-like manner<sup>47</sup>. As predicted from functional assays,  
136 single-particle cryoEM analyses of MthK channels in the absence and presence of Ca<sup>2+</sup>  
137 yield structures of closed and inactivated channels, respectively, with the inactivated  
138 structure prominently displaying the N-terminus lodged inside the pore<sup>47</sup>. The obvious  
139 prediction from these results is that freezing MthK channels on cryoEM grids within ~100  
140 ms of Ca<sup>2+</sup> application, after the channel opens but before it inactivates, will reveal the  
141 structure of an open channel and other intermediates, completing the picture of the gating  
142 cycle. Using time-resolved Spotiton to mix MthK and Ca<sup>2+</sup>, we observed that at ~150 ms,  
143 the major class resulting from 3D classification has the TM domain in the nanodisc tilted  
144 with respect to the large extra-membranous density (Figure 2b, top). This pronounced tilt  
145 is one of the hallmarks of a Ca<sup>2+</sup>-bound open MthK state and is different from the closed  
146 MthK structure obtained in the absence of Ca<sup>2+</sup>, which displays little to no tilt<sup>47</sup> (Figure 2b,  
147 top). Analysis of the large ligand binding domain (RCK gating ring) alone from all classes  
148 revealed that the major conformation of the gating ring indeed corresponds to that of the  
149 open MthK structure<sup>31 47</sup> (Figure S3b). In addition, densities for Ca<sup>2+</sup> ions were observed  
150 at all known binding sites in the open MthK structure (Figure 2b, bottom and Figure S3a).  
151 While the data is not yet sufficient to identify if the channel is open or inactivated - as the  
152 density for the transmembrane domains within the nanodiscs is weak - these results  
153 indicate that Ca<sup>2+</sup> not only successfully mixed and bound to MthK, but also managed to  
154 induce a conformational change to an activated state.

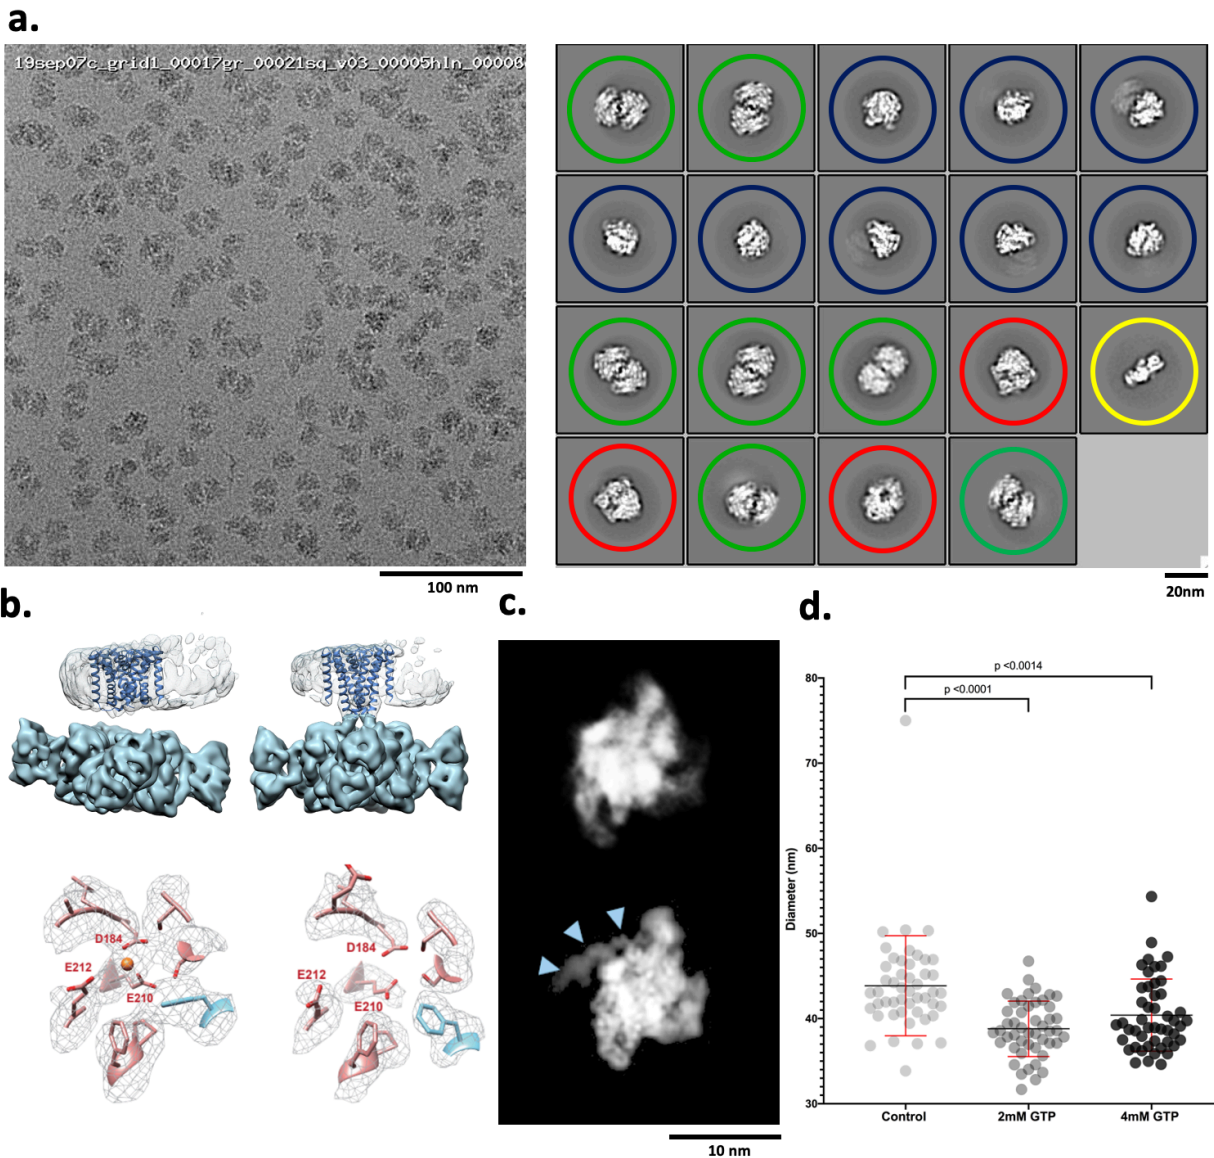

**Figure 2:** Four examples of biological systems where time-resolved cryoEM provides answers. (a) *left:* Representative micrograph from the mixed region of a Spotiton prepared grid shows 30S and 50S ribosomal subunits and 70S complexes; *right:* corresponding 2D classes show particles representing a population of 30S (yellow), 50S (blue), 50S-50S dimers (green), and 70S (red). ~20% of particles were reconstructed to a 70S complex at a resolution of 4.75 Å (see Methods and Figure S2). (b) 3D maps generated from MthK in the presence (*top left*) or absence (*top right*) of calcium showing clear differences in the overall conformation of the channel. The bottom row shows one of the three Ca<sup>2+</sup> binding sites in MthK either occupied in the case of a mixing experiment (*left*) or vacant as with the MthK only control (*right*). (c) Representative class averages of RNAP alone (*top*) or mixed with promoter DNA (*bottom*) showing DNA clearly bound (blue arrowheads). (d) Measured diameters (mean ± SD) of dynamin-decorated tubes without (control: 43.85, ± 5.86, n=48) and with GTP (2 mM: 38.80, ± 3.2, n=48; 4 mM: 40.40, ± 4.23, n=48). Student's t test p values are shown.

156 RNA synthesis by all DNA-dependent RNA polymerases (RNAP) is a tightly regulated  
157 dynamic process involving large-scale conformational changes in both the enzyme and  
158 DNA. Mechanistic investigations of the formation of the transcriptionally-competent open  
159 complex, Rpo, by bacterial RNAP have defined a multi-step pathway where a series of  
160 intermediates appear and disappear on the subsecond to seconds time scale<sup>32 33</sup>. While  
161 “kinetically-significant” intermediates in RPo formation were identified decades ago<sup>34</sup>,  
162 their transient nature has prevented atomic resolution structural characterization. As a  
163 consequence, the conformational changes involved in their isomerizations and how they  
164 are targeted by regulatory factors remain largely unknown. While the use of temperature  
165 or other variables have historically been used to trap intermediates at equilibrium in  
166 solution, the ultimate goal is to capture structural snapshots of them as they interconvert  
167 in time. To this end, we examined DNA opening by *E. coli* RNAP holoenzyme at the  $\lambda P_R$   
168 promoter using time-resolved Spotiton. The kinetics of RPo formation at  $\lambda P_R$  have been  
169 extensively characterized, allowing predictions of intermediate populations as a function  
170 of time and solution conditions<sup>32</sup>. Within the ~150 ms time of mixing and freezing only the  
171 earliest intermediates are predicted to be present. The 2D class averages from this  
172 experiment show DNA bound to RNAP in a conformation consistent with promoter  
173 recognition (Figure 2c). Future experiments that vary time, solution conditions, and  
174 promoter sequence combined with 3D classification strategies are anticipated to reveal  
175 the on-pathway nucleation and propagation of the transcription bubble.

176  
177 Finally, we looked at the dynamics of dynamin at the ~150 ms timescale. During GTP  
178 hydrolysis, dynamin constricts and pinches off invaginating clathrin-coated vesicles.  
179 Previous results have shown dynamin constricts the membrane within seconds and  
180 during this process the helical parameters transform from a 1-start to a 2-start helix<sup>35 36</sup>.  
181 However, the rate and mechanism of how the dynamin polymer constricts and rearranges  
182 during GTP hydrolysis remain unknown. Using time-resolved Spotiton to mix pre-formed  
183 dynamin tubes with GTP, we observed that at ~150 ms, a high percentage of the dynamin  
184 decorated tubes were constricted (i.e. the lumen of the lipid bilayer was reduced) to 39  
185 nm upon mixing with 2 mM GTP compared to 44 nm for untreated controls (Figure 2d).  
186 Upon mixing with 4 mM GTP, the dynamin polymer becomes disordered, constricts, and  
187 disassembles from the lipid bilayer (Figure 2d and S4). This work provides the first clues  
188 to the initial steps that lead to dynamin-mediated membrane constriction and fission. We  
189 expect further analysis incorporating a decreasing range of GTP concentrations will trap  
190 the reaction at the slowest step, allowing changes in the dynamin organization during  
191 early fission events to be observed.

192  
193 These four biological cases represent a range of short-lived molecular states of high  
194 interest and demonstrate that samples can be successfully mixed on a grid and rapidly  
195 vitrified within ~100 ms to trap intermediates present at this time scale. This method uses  
196 very small quantities of material and is applicable to mixing together any two, or potentially  
197 more, samples to allow the capture of short-lived molecular states that appear between  
198 50-500 ms after an initial interaction.



## 199 **Methods**

---

200

### 201 **Spotiton Instrument**

202 The Spotiton system<sup>18 19</sup> was upgraded with a second set of identical dispense head  
203 components. A second piezo driven electric tip was mounted next to the first head 4.5  
204 mm from the first tip (Figure S1b). The 4.5 mm pitch allows the two tips to simultaneously  
205 aspirate sample from two adjacent holder tubes also mounted at a 4.5 mm pitch. The  
206 second tip includes a manual fine adjustment screw to allow precise alignment between  
207 the two tips in the direction perpendicular to the plunge axis motion.

208

209 The second piezo electric tip is driven by an independent electronic drive (DE03  
210 controller) which was added to the system. The plunge axis outputs a series of electrical  
211 pulses while plunging (distance between pulses is a parameter set to 0.25 mm). The  
212 plunge axis pulse output is tied to the trigger input of both DE03 controllers. Each DE03  
213 controller can be setup to start firing its respective tip after a unique number of pulses  
214 (configurable by the user) relating to the position of the plunge axis. The fluidics of the  
215 second piezo electric tip are attached to a second syringe pump which was added to the  
216 system. The syringe pumps allow precise independent sample aspiration and cleaning of  
217 the tips.

218

219 *Time resolution:* The motion path (136 mm) of a grid prepared by the Spotiton time-  
220 resolved system is characterized by three phases: acceleration, constant velocity, and  
221 deceleration (Figure S1a). The durations of the acceleration and constant velocity phases  
222 are variable and dependent on the rate of acceleration set by the user. The deceleration  
223 phase remains fixed and ends when the grid comes to a stop in the liquid ethane cup.  
224 The two dispensers spray a defined number of sample droplets whose first contact with  
225 the falling grid is separated by a period of time between 3-7 ms, depending on the  
226 acceleration rate selected. The first sample thus has a brief opportunity to be wicked away  
227 by the capillary action of the nanowires prior to contact by the second sample. (Figure  
228 S1b) The mixing time of the two samples prior to vitrification ranges from 130-160 ms but  
229 can be reduced to ~90 ms by moving the dispensers to a “low-fire” position ~4 cm closer  
230 to the ethane bath (Condition 4 in Table S1). A redesigned instrument would in principle  
231 be capable of even shorter mixing times; for example, the commercial version of the  
232 Spotiton system, Chameleon (SPT Labtech), is capable of spot-to-plunge times of ~50  
233 ms.

234

235 *Time-resolved Spotiton operation:* A typical protocol for operating the time-resolved  
236 Spotiton system proceeds as follows. On startup, the system is initialized, and the two  
237 three-axis robots used to position the grid-holding tweezers and the dispensing heads are  
238 homed. Next, the fluid lines carrying distilled water from an external reservoir to the  
239 dispensing tips are flushed several times to remove air bubbles and any residual  
240 methanol used to clean the tips after the previous session. Both tips are then fired in view  
241 of an inspection camera to confirm successful dispensing and the formation of discrete  
242 droplets<sup>19</sup>. Next, a standard (not nanowire) test grid is loaded into the tweezers, lowered  
243 into position between the upper camera and the upper dispenser tip, and both are  
244 observed for alignment in the live viewer in the main software window. Aided by an

245

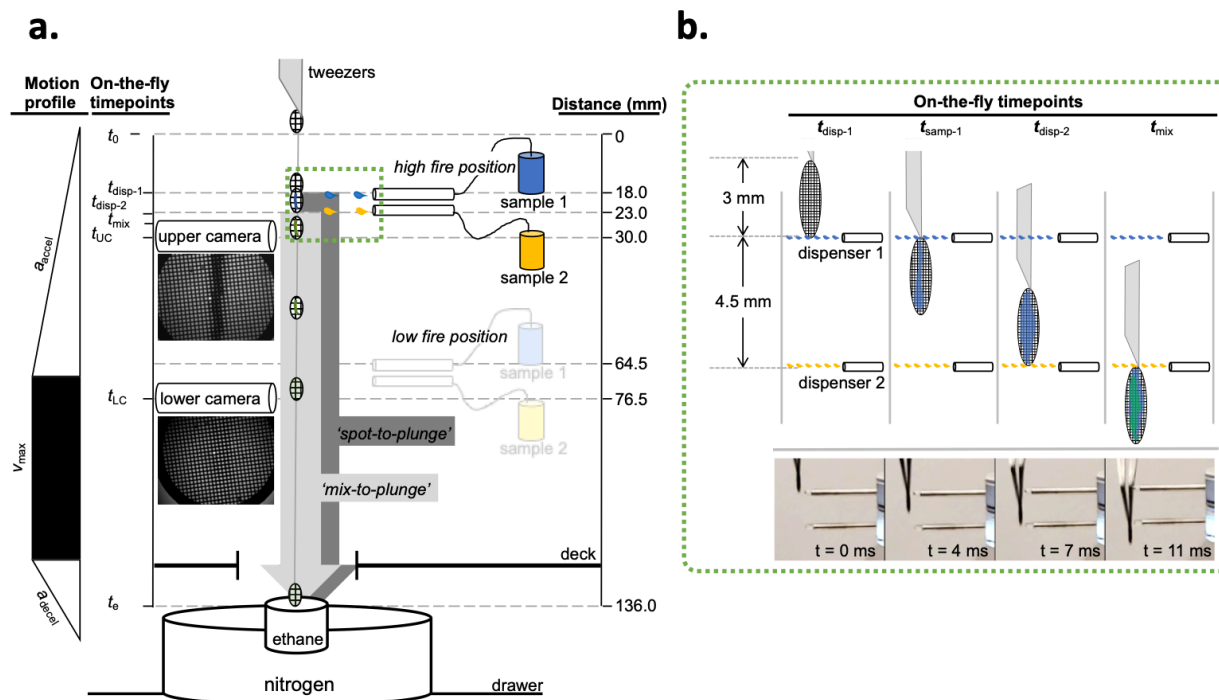

**c.**

|             | Firing position   | $a_{accel}$<br>(mm/s <sup>2</sup> ) | $a_{decel}$<br>(mm/s <sup>2</sup> ) | $V_{max}$<br>(mm/s) |
|-------------|-------------------|-------------------------------------|-------------------------------------|---------------------|
| Condition 1 | high fire (2 cam) | 5,000                               | 20,000                              | 1,000               |
| Condition 2 | high fire (2 cam) | 10,000                              | 20,000                              | 1,000               |
| Condition 3 | high fire (2 cam) | 20,000                              | 20,000                              | 1,000               |
| Condition 4 | low fire (1 cam)  | 10,000                              | 20,000                              | 1,000               |

**Table S1:** Motion profile settings for four example plunge conditions

|             | $t_0$ to $t_{disp-1}$<br>(ms) | $t_0$ to $t_{disp-2}$<br>(ms) | $t_0$ to $t_{mix}$<br>(ms) | $t_{disp-1}$ to $t_e$<br>(ms) | $t_{mix}$ to $t_e$<br>(ms) |
|-------------|-------------------------------|-------------------------------|----------------------------|-------------------------------|----------------------------|
| Condition 1 | 85                            | 96                            | 102                        | 176                           | 159                        |
| Condition 2 | 60                            | 68                            | 72                         | 151                           | 139                        |
| Condition 3 | 42                            | 48                            | 51                         | 144                           | 135                        |
| Condition 4 | 114                           | 119                           | 122                        | 97                            | 89                         |

**Table S2:** Elapsed times for key portions of the plunge path

|             | $V_{disp-1}$<br>(mm/s) | $V_{samp-1}$<br>(mm/s) | $V_{disp-2}$<br>(mm/s) | $V_{mix}$<br>(mm/s) |
|-------------|------------------------|------------------------|------------------------|---------------------|
| Condition 1 | 424                    | 458                    | 479                    | 509                 |
| Condition 2 | 600                    | 648                    | 678                    | 721                 |
| Condition 3 | 849                    | 917                    | 960                    | 1000*               |
| Condition 4 | 1000*                  | 1000*                  | 1000*                  | 1000*               |

**Table S3:** Grid velocities at specified time points of the plunge path

|             | $t_{disp-1}$<br>(ms) | $t_{samp-1}$<br>(ms) | $t_{disp-2}$<br>(ms) | $t_{mix}$<br>(ms) |
|-------------|----------------------|----------------------|----------------------|-------------------|
| Condition 1 | 0                    | 6.8                  | 11.1                 | 17.1              |
| Condition 2 | 0                    | 4.8                  | 7.8                  | 12.1              |
| Condition 3 | 0                    | 3.4                  | 5.5                  | 8.6               |
| Condition 4 | 0                    | 3.0                  | 5.0                  | 8.0               |

**Table S4:** Elapsed times from  $t_{disp-1}$  timepoint

**Figure S1:** Specifications of time-resolved Spotiton operation. (a) Diagrammatic overview of the distances (fixed) and elapsed times (variable) relevant to spraying and mixing two samples on a moving grid. Simultaneous dispensing of both samples is triggered after the grid plunge begins. Representative images from the upper and lower cameras are shown directly below the illustrations of each. Sample 1 and sample 2 are indicated in blue and yellow, respectively. (b) Magnified view of (green-dashed) boxed area in (a) showing grid and dispensing at specific time-points with corresponding high-speed video captures of the tips and grid below. Elapsed times shown on each image reflect estimates from a video of a grid plunged under Condition 2. Objects in (a) and (b) are not drawn to scale. Tables S1-S4 in (c) show values for the following parameters of a grid plunge as depicted in (a) and (b):  $a_{accel}$ , acceleration rate;  $a_{decel}$ , deceleration rate;  $V_{max}$ , maximum velocity;  $t_0$ , plunge start point;  $t_{disp-1}$ , grid leading edge reaches first dispenser;  $t_{samp-1}$ , sample 1 fully applied to grid;  $t_{disp-2}$ , grid leading edge reaches second dispenser;  $t_{mix}$ , samples 1 and 2 fully applied to grid;  $t_{UC}$ , grid reaches upper camera;  $t_{LC}$ , grid reaches lower camera;  $t_e$ , grid plunges into ethane. 'Spot-to-plunge' and 'mix-to-plunge' in (a) reflect the elapsed times from  $t_{disp-1}$  or  $t_{mix}$  to  $t_e$ , respectively.

247 integrated image-recognition algorithm, the operator positions the tip along the vertical  
248 midline and at the leading (lower) edge where the first dispensed droplets will contact the  
249 grid. The second piezo device is locked into position directly beneath the first, but its tip  
250 is steerable to allow the second sample to be dispensed either completely overlapping  
251 the first sample strip or in a discrete, non-contacting parallel strip. To verify operation,  
252 each tip is fired separately on the test grid and video captures from the upper camera are  
253 examined to confirm deposition of a liquid stripe. To verify tip alignment (i.e. both stripes  
254 are deposited onto the same grid area), both tips are fired simultaneously, and the video  
255 capture is examined for the presence of a single overlapping liquid stripe. Once  
256 successful two-tip dispensing on the test grid is confirmed, the humidity of the chamber  
257 is increased to 80-85% by activating the in-chamber nebulizer. Next, 5  $\mu\text{L}$  of each sample  
258 is loaded into the sample holder cups, placed in the humidified chamber, and  
259 simultaneously aspirated into the two tips. Successful firing is again confirmed as  
260 described above.

261  
262 The system is now ready to prepare vitrified grids. First, the upper tip is positioned in front  
263 of the upper camera as before and a plasma treated, nanowire grid is loaded into the  
264 tweezers. To avoid saturating the nanowires with water, thereby reducing the wicking  
265 capacity, exposure of the grid to the high humidity environment within the chamber is  
266 limited to 10-60 s prior to plunging, depending on the observed performance of the  
267 particular batch of nanowire grids being used. During a typical plunge, a grid acceleration  
268 of  $10 \text{ m/s}^2$  and a tip firing frequency of 14,750 Hz results in the deposition of  $\sim 70$  droplets  
269 ( $\sim 4 \text{ nl}$  volume) of each sample onto the grid. This is observed as a single thick, opaque  
270 band of liquid down the grid in the upper camera video capture that wicks to a thin film  
271 that is nearly invisible in the lower camera video capture acquired 49 ms later, just before  
272 the grid plunges into the liquid ethane (Figure S1a). To generate control grids with two  
273 non-overlapping sample strips separated by several squares, the lower, steerable tip can  
274 be adjusted to bring the tips out of alignment, as mentioned above, or more simply, we  
275 can change the acceleration of the grid. During our characterization of the system, we  
276 noted that when the tips are aligned to form completely overlapping stripes at a set  
277 acceleration (e.g.  $10 \text{ m/s}^2$ ), the stripes can, at other accelerations, become misaligned,  
278 e.g. merging of only the leading ( $8 \text{ m/s}^2$ ; see Figure 1a) or trailing ( $5 \text{ m/s}^2$ ) ends, or even  
279 deposited as two parallel and completely separated stripes ( $6 \text{ m/s}^2$ ). While we do not  
280 fully understand the mechanics of this phenomenon, it is reliably reproducible and can be  
281 used to make a control grid with two well separated streams of sample by a simple  
282 adjustment of the acceleration.

283  
284 Compared to the original Spotiton protocols<sup>19</sup>, grid preparation and timing was adjusted  
285 to account for wicking of double the usual sample volume. This required optimizing our  
286 self-wicking grids<sup>20</sup> to have longer length and higher density nanowires to create a faster  
287 and higher volume wicking area.

### 288 **Sample preparation**

289 A series of experiments was performed to first test and verify mixing of protein samples  
290 on the grids and then to demonstrate the value of this approach for a variety of biological  
291 systems of interest. In general, vitrified grids of mixed samples were prepared as follows.  
292

293 Nanowire grids were freshly plasma cleaned and transferred into the humidity chamber  
 294 (set to 80-85% humidity) no more than 30 seconds prior to vitrification. 5  $\mu$ L of each  
 295 sample was loaded into the two sample holder cups with concentrations as tabulated in  
 296 Table S5. For control experiments, the second sample was replaced by the carrying  
 297 buffer as noted. The calculated spot-to-plunge time for all of the grids is 151 ms. Below  
 298 we briefly describe further details of sample and grid preparation for each of these  
 299 experiments.

| Experiment                    | Sample (concentration in dispenser)           |
|-------------------------------|-----------------------------------------------|
| ApoF + 70S mixed              | Tip 1 Apoferritin (2.3 mg/ml)                 |
|                               | Tip 2 70S ribosomes (1mg/ml)                  |
| 50S + 30S mixed               | Tip 1 50S (1.4 $\mu$ M)                       |
|                               | Tip 2 30S (1.4 $\mu$ M)                       |
| 50S or 30S only               | Tip 1 50S or 30S (1.4 $\mu$ M)                |
|                               | Tip 2 Buffer                                  |
| MthK + Ca <sup>2+</sup> mixed | Tip 1 MthK (12 mg/ml), Fos8-F (3 mM)          |
|                               | Tip 2 Ca <sup>2+</sup> (30 mM), Fos8-F (3 mM) |
| MthK only                     | Tip 1 MthK (12 mg/ml), Fos8-F (3 mM)          |
|                               | Tip 2 Buffer, Fos8-F (3 mM)                   |
| RNAP + DNA mixed              | Tip 1 DNA (24 $\mu$ M), beta-OG (0.35%)       |
|                               | Tip 2 RNAP (8 mg/ml), beta-OG (0.35%)         |
| RNAP only                     | Tip 1 Buffer, beta-OG (0.35%)                 |
|                               | Tip 2 RNAP (8 mg/ml), beta-OG (0.35%)         |
| Dynamin tubes + GTP mixed     | Tip 1 Dynamin tubes                           |
|                               | Tip 2 GTP (2 mM & 4 mM)                       |
| Dynamin only                  | Tip 1 Dynamin tubes                           |
|                               | Tip 2 Buffer                                  |

**Table S5:** Spotiton sample preparation conditions.

300  
 301 *Apoferritin and 70S ribosomes:* Apoferritin was purchased from Sigma Aldrich, 400 kDa,  
 302 A3660, 2.3 mg/ml. Protein solution stored in 50% glycerol was exchanged into a cryo  
 303 compatible buffer (50 mM Tris-Cl [pH 7.6]; 150 mM NaCl) using Amicon Ultra-15  
 304 centrifugal filter units (100 kDa cutoff membrane). 70S ribosomes were purchased from  
 305 New England BioLabs Inc, 2MDa. Protein solution was stored in 20 mM HEPES-KOH [pH  
 306 7.6], 10 mM Mg(CH<sub>3</sub>COO)<sub>2</sub>, 30 mM KCl, and 7 mM  $\beta$ -mercaptoethanol after diluting the  
 307 sample to 1 mg/ml from 33.3 mg/ml.

308  
 309 *30S an 50S ribosomal subunits:* 70S ribosomes are prepared as described in<sup>37</sup>. For  
 310 subunit purification, 70S ribosomes were exchanged into dissociation buffer (20 mM  
 311 MES-KOH [pH 6], 600 mM KCl, 8 mM Mg(CH<sub>3</sub>COO)<sub>2</sub>, 1 mg/ml heparin, 0.1 mM PMSF,

312 0.1 mM benzamidine, and 2 mM DTT) before loading onto a sucrose gradient in the same  
313 buffer and centrifuged for 19 hr at 28,500 RPM in the Ti25 rotor. The 50S and 30S  
314 subunits were exchanged separately into reassociation buffer (10 mM MES-KOH [pH 6],  
315 10 mM  $\text{NH}_4\text{CH}_3\text{COO}$ , 40 mM  $\text{CH}_3\text{COOK}$ , 8 mM  $\text{Mg}(\text{CH}_3\text{COO})_2$ , and 2 mM DTT),  
316 concentrated to 6  $\mu\text{M}$ , and stored at  $-80^\circ\text{C}$  after being flash frozen in liquid nitrogen.

317  
318 *RNA Polymerase plus promoter DNA*: Core RNAP (subunit composition  $\alpha_2\beta\beta'\omega$ ) was  
319 expressed and purified as described<sup>38</sup>. The specificity subunit  $\sigma^{70}$  was expressed and  
320 purified as described<sup>38</sup> with the following modifications: i. a plasmid encoding His(6)-  
321 SUMO- $\sigma^{70}$  was used instead of His(10)-SUMO- $\sigma^{70}$ ; ii. cells were grown at  $30^\circ\text{C}$  in the  
322 presence of 50  $\mu\text{g}/\text{mL}$  kanamycin until OD 0.4, then temperature was lowered to  $16^\circ\text{C}$ ;  
323 iii. when the cells reached OD 0.7, 0.1 mM IPTG was added and growth continued for an  
324 additional 15 hrs. After harvest by centrifugation and resuspension in lysis buffer<sup>38</sup>, cells  
325 were flash frozen in liquid nitrogen and stored overnight at  $-80^\circ\text{C}$ . Cells were thawed  
326 halfway at  $22^\circ\text{C}$ , thawed completely on ice, and then lysed in a French press. After lysis,  
327 the series of columns and buffers used to purify  $\sigma^{70}$  were as described<sup>38</sup>. For promoter  
328 DNA, a duplex  $\lambda\text{P}_R$  promoter fragment (-85 to +20) was used (Trilink Biotechnologies,  
329 San Diego, CA). Top (non-template) strand: '5 C GGA ATC GAG GGA TCC TCT AGA  
330 GTT GGA TAA ATA TCT AAC ACC GTG CGT GTT GAC TAT TTT ACC TCT GGC GGT  
331 GAT AAT GGT TGC ATG TAC TAA GGA GGT TGTA G 3'. Bottom (template-strand): 5'  
332 C TACA ACC TCC TTA GTA CAT GCA ACC ATT ATC ACC GCC AGA GGT AAA ATA  
333 GTC AAC ACG CAC GGT GTT AGA TAT TTA TCC AAC TCT AGA GGA TCC CTC GAT  
334 TCC G 3'. RNAP holoenzyme was assembled by mixing core with a 3.3 molar excess of  
335  $\sigma^{70}$ , incubating for 20 min at  $37^\circ\text{C}$ , and buffer exchanging into gel filtration (GF) buffer (40  
336 mM Tris-HCl [pH 8.0], 120 mM KCl, 10 mM  $\text{MgCl}_2$  and 10 mM DTT) using centrifugal  
337 filtration (Amicon-Ultra-0.5 m 30K cutoff) at  $4^\circ\text{C}$ . Excess  $\sigma^{70}$  was separated from core  
338 RNAP on a Superose 6 increase 10/300 GL column (GE Healthcare) equilibrated in GF  
339 buffer. The eluted fractions of RNAP were concentrated to 16 mg/ml (centrifugal filtration),  
340 aliquoted, flash frozen in liquid nitrogen, and stored at  $-80^\circ\text{C}$ . The non-template and  
341 template strands of  $\lambda\text{P}_R$  promoter DNA were dissolved in annealing buffer (10 mM Tris-  
342 HCl [pH 8], 50 mM KCl, 0.1 mM EDTA), mixed in equimolar amounts and incubated in a  
343  $95^\circ\text{C}$  heat block for 10 min. The samples were then slow cooled in the heat block to room  
344 temperature. Annealed DNA was stored at  $-80^\circ\text{C}$ . RNAP and DNA aliquots were thawed  
345 on ice, diluted to the concentrations reported in Table S5 with GF buffer. N-octyl- $\beta$ -D-  
346 glucopyranoside (Anatrace) was added to 0.35% final just before spraying.

347  
348 *Ca<sup>2+</sup> activated channel MthK*: MthK was purified and reconstituted into nanodiscs  
349 composed of 3:1 POPE:POPG, following the procedure described in detail previously<sup>39</sup>  
350 <sup>47</sup>.

351  
352 *Dynamain tubes plus GTP*: Liposome formation and dynamain purification: 1,2-dioleoyl-sn-  
353 glycerol-3-phospho-L-serine (100 l of 5 mg/ml, DOPS, Avanti) was dried and resuspended  
354 in 250  $\mu\text{l}$  HCB150 (50 mM HEPES, 150 mM KCl, 2 mM EGTA, 1 mM  $\text{MgCl}_2$ , 1 mM TCEP,  
355 [pH 7.5]). Unilamellar liposomes were obtained by extruding the mixture 21 times through  
356 a 0.4  $\mu\text{m}$  pore-size polycarbonate membrane (Avanti). Recombinant  $\Delta\text{PRD}$ -dynamain 1  
357 was purified from Sf9 insect cells. Briefly, recombinant baculovirus containing the

358 sequence of  $\Delta$ PRD-dynamin 1 with an N-terminal His-tag, was generated by following  
 359 Bac-to-Bac Baculovirus Expression System (ThermoFisher Scientific). The suspension  
 360 cultures of Sf9 were maintained in Sf-900 III serum-free media (SFM, ThermoFisher  
 361 Scientific) and inoculated with recombinant baculovirus at a cell density of  $1.6 \times 10^6$  with  
 362 1/100 volume of virus/final volume of medium. The cells were grown for 72 h at 27°C, and  
 363 pelleted by centrifugation at 1000 x g, 5 min, 4°C. The pellet was resuspended in 3  $\mu$ l  
 364 modified HSB150 (50 mM HEPES, 150 mM KCl, 5 mM beta-mercaptoethanol, 10 mM  
 365 imidazole, [pH 8.0]) and containing protease inhibitor cocktail (Millipore Sigma). The cells  
 366 were then lysed by sonication (total time of 8 min with 5 s pulse-on and 15 s pulse-off)  
 367 followed by high speed centrifugation (20,000 x g, 15 min). The supernatant was  
 368 collected, passed through Ni-NTA beads and the protein was eluted with 150 mM  
 369 imidazole in modified HSB150. The protein solution was dialyzed in HSB150 overnight  
 370 and the purity was checked using SDS-PAGE/Coomassie staining. Dynamin decorated  
 371 tubes were generated by incubating 3  $\mu$ l of DOPS liposomes with 40  $\mu$ l of protein (0.8  
 372 mg/ml, in 10 mM Tris, 10 mM KCl, 1 mM MgCl<sub>2</sub>, [pH 7.4]) for 2 h.

### 373 374 **Imaging and analysis**

375 Typically, data was acquired using Legikon MS<sup>40</sup> and micrographs were collected either  
 376 on a Titan Krios (Thermo Fisher Scientific) with a K2 or K3 BioQuantum counting camera  
 377 (Gatan, Inc.) operating in counting mode or on a Tecnai F20 equipped with a TVIPS  
 378 CMOS camera. The nominal magnification, pixel size, exposure time, frame rate, total  
 379 dose, and defocus range were as shown in Table S6 for each experiment. For all  
 380 datasets, frames were aligned using MotionCorr2<sup>41</sup> and CTF was estimated using  
 381 Ctffind4<sup>42</sup>.

| Sample                           | Microscope/<br>Detector | Nominal<br>magnification | Pixel size | Dose rate<br>(e-/px/sec) | Total dose<br>(e-/Å <sup>2</sup> ) | Frame rate<br>(ms) | Defocus range<br>( $\mu$ m) | Total images | Particles<br>selected |
|----------------------------------|-------------------------|--------------------------|------------|--------------------------|------------------------------------|--------------------|-----------------------------|--------------|-----------------------|
| 30S + 50S<br>mixed               | Titan Krios/K2          | 105,000                  | 1.096      | 8                        | 64.61                              | 200                | 1.4 - 3                     | 3586         | 604,271               |
| 50S only                         | Titan Krios/K2          | 130,000                  | 0.855      | 8                        | 69.13                              | 200                | 1.5 - 3                     | 668          | 25,412                |
| 30S only                         | Titan Krios/K2          | 130,000                  | 0.855      | 8                        | 69.13                              | 200                | 1.5 - 3                     | 333          | 18,434                |
| MthK + Ca <sup>2+</sup><br>mixed | Titan Krios/K3          | 81,000                   | 1.0825     | 4                        | 42.18                              | 50                 | 1 - 3                       | 4329         | 2,158,345             |
| MthK only                        | Titan Krios/K2          | 81,000                   | 1.0825     | 8                        | 43.57                              | 50                 | 1 - 3                       | 7420         | 956,882               |
| RNAP + DNA<br>mixed              | Titan Krios /K2         | 29,000                   | 0.832      | 8                        | 69.74                              | 200                | 1.2 - 2.2                   | 3535         | 745,167               |
| RNAP only                        | Titan Krios/K3          | 10,500                   | 1.096      | 4                        | 67.26                              | 200                | 1.2 - 2.2                   | 3945         | 277,685               |
| Dynamin + GTP<br>mixed           | F20/K2                  | 29,000                   | 1.27       | 8                        | 40                                 | 250                | 1.5 - 3                     | 170          | -                     |
| Dynamin only                     | F20/TVIPS               | 62,000                   | 3          | -                        | 62.17                              | -                  | 2.5                         | 66           | -                     |

382 **Table S6:** Cryo-EM imaging parameters.

383 *70S association complex, 50S and 30S ribosomal subunits*: Particle picking was  
384 performed with Gautomatch ([http:// www.mrc-lmb.cam.ac.uk/kzhang/](http://www.mrc-lmb.cam.ac.uk/kzhang/)) and extracted in  
385 Relion by 5X binning followed by one round of 2D classification using Relion<sup>48</sup> to remove  
386 false particles. After this first round of 2D classification, classes clearly representing 50S  
387 dimers and 30S and 50S particles (Figure 2a) were excluded from further steps of image  
388 analysis. After one round of 3D classification, only recognizable 70S particles were  
389 selected and reextracted to a pixel size of 2.2 Å for final refinement. A total of 26,402  
390 particles were used for homogeneous 3D refinement in Relion resulting in a 4.8 Å map of  
391 the 70S ribosome (Figure S2a and b). For the control experiments, a procedure similar to  
392 that described above was used to obtain a total of 12,505 and 3,762 individual 50S and  
393 30S particles, respectively, and 2D classified in Relion (Figures S2c and d).

394  
395 *MthK with and without Ca<sup>2+</sup>*: Typically, a small set of particles was manually picked, and  
396 2D class averages were calculated using the CL2D algorithm<sup>43</sup> inside the Appion image  
397 processing pipeline<sup>44</sup>. A subset of these classes was used as templates to pick particles  
398 for the entire set of micrographs using FindEM<sup>45</sup>. For MthK without Ca<sup>2+</sup>, from 956,882  
399 particles and after several rounds of 2D and *ab initio* classification in Cryosparc<sup>49</sup>. 428,917  
400 particles were used for a final 3D classification and the best class was selected and used  
401 for Cryosparc2 non-uniform refinement to generate a structure with an overall resolution  
402 of 4.2 Å as shown in top right of Figure 2b.  
403

404 For MthK with Ca<sup>2+</sup>, a procedure was used similar to that described above. Briefly,  
405 2,158,345 particles were auto picked and used for 2 rounds of 2D classification in Relion3.  
406 From these, 849,864 good particles were selected and used for 3D classification in  
407 Relion3. The open state class with a highly tilted RCK domain was selected and used for  
408 Cryosparc2 non-uniform refinement to generate a structure with an overall resolution of  
409 6.3 Å as shown in top left of Figure 2b.

410  
411 For the focused refinement of the RCK domain, signal subtracted particles of both  
412 samples were generated with a mask to only include the RCK domain. These particles  
413 were used for refinement in Relion3 applying C2 symmetry and the overall resolution is  
414 4.1 Å for Mthk with Ca<sup>2+</sup> and 3.5 Å for MthK without Ca<sup>2+</sup> (Figure S3b).

415  
416 *RNAP with and without DNA*: Particle picking was performed with Gautomatch and  
417 extracted in Relion followed by one round of 2D classification to remove false picks using  
418 2D classification tool in Cryosparc<sup>49</sup>. 167,212 particles of RNAP with λP<sub>R</sub> promoter DNA  
419 and 52,747 particles of RNAP alone are used for another round of 2D classification and  
420 the 2D classes with high resolution features were selected (Figure 2c).

421  
422 *Dynamamin with and without GTP*: 46, 28, and 100 images were collected for dynamin-  
423 decorated tubes mixed with 4 mM GTP, 2 mM GTP and no GTP, respectively. For each  
424 condition, the diameters of 48 tubes were measured using Fiji<sup>46</sup>.

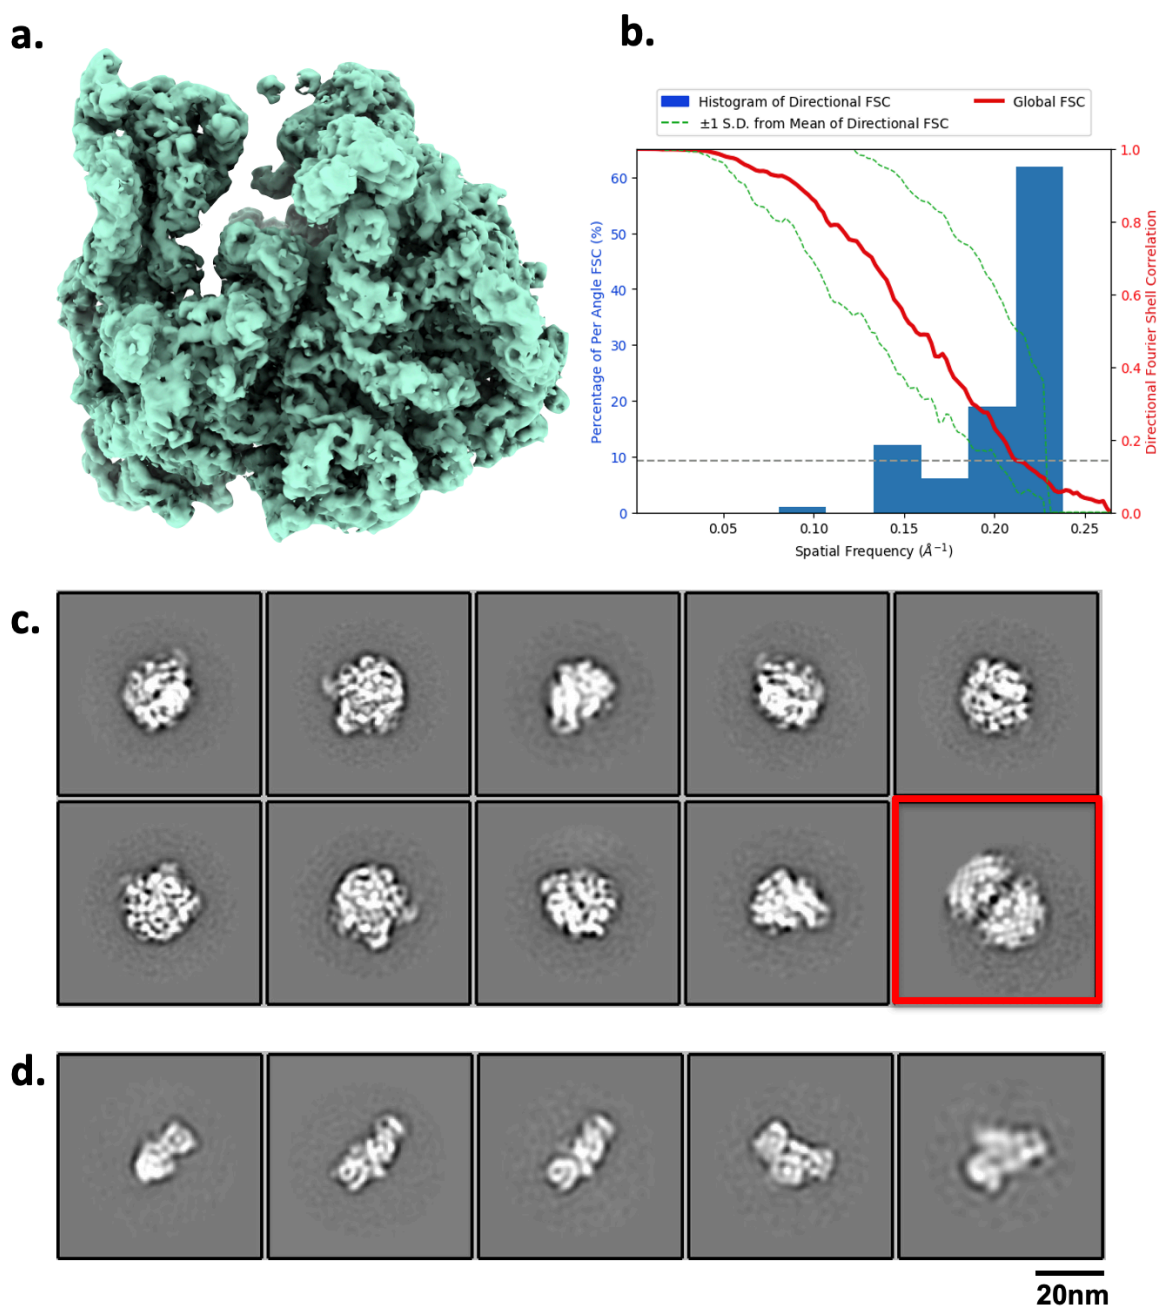

**Figure S2:** Mixing 30S and 50S ribosomal subunits to form 70S complexes. (a) ~20% of particles present were reconstructed to 70S complex at a resolution of 4.75  $\text{\AA}$  as indicated by  $FSC_{0.5}$  (b). (c) 2D classes of 50S ribosomal subunit obtained from the control experiment; 2D class of 50S-50S dimer is shown in red. (d) 2D classes of the 30S ribosomal subunit obtained from the control experiment. Both control experiments show no evidence of 70S ribosomes as observed in the mixed experiment.



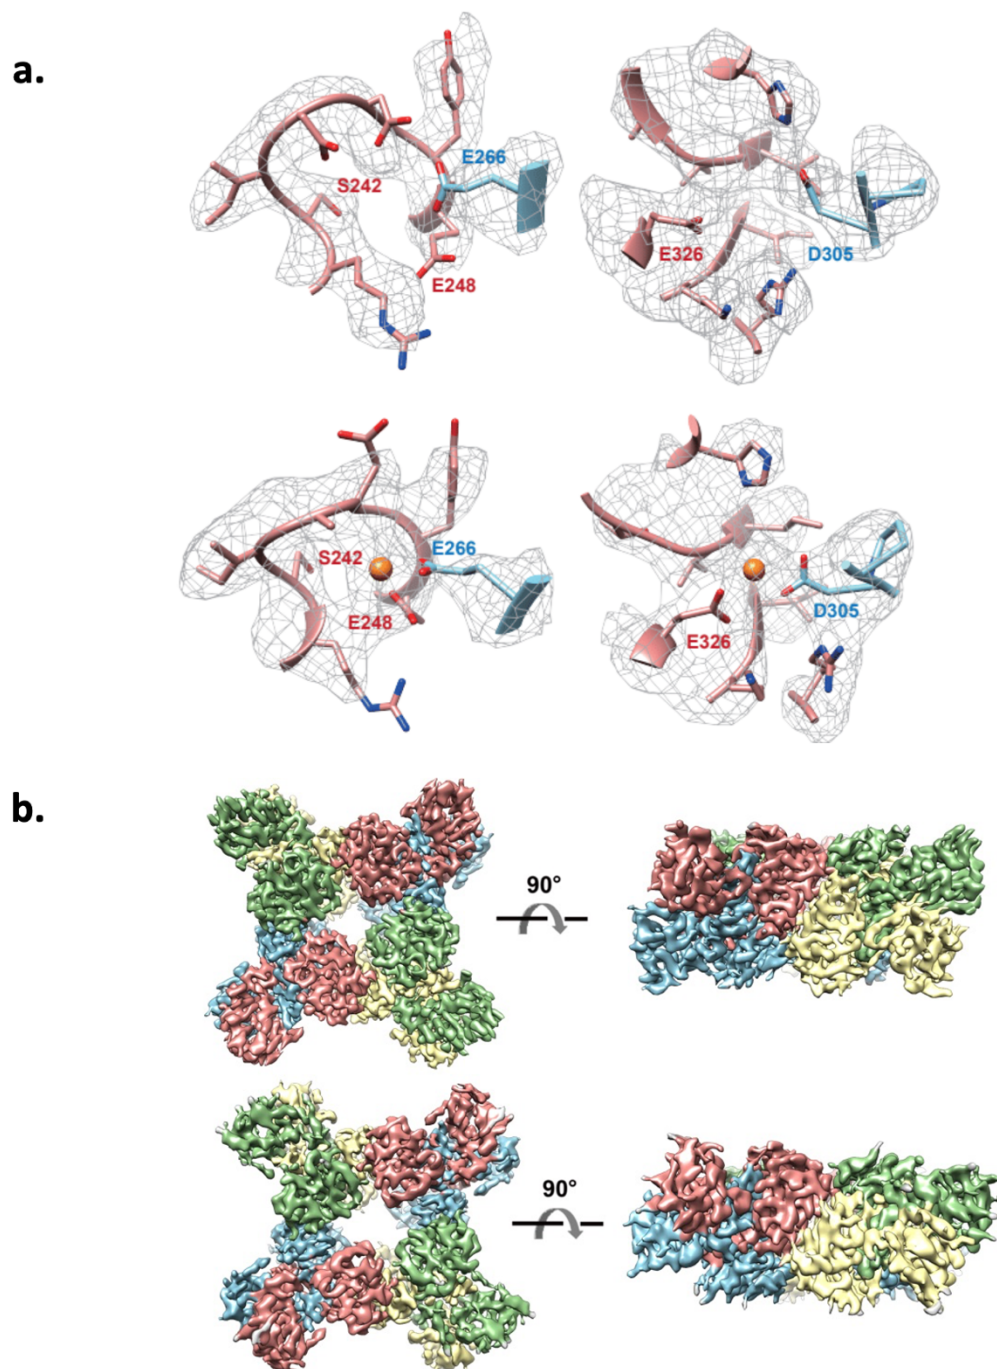

**Figure S3:** Cryo-EM maps of MthK RCK domain with and without  $\text{Ca}^{2+}$  (a) The two additional  $\text{Ca}^{2+}$  binding sites of MthK either vacant from a control experiment (top row) or occupied after mixing with calcium (bottom row). (b) 3D models of MthK RCK domains without (top row) and without (bottom row)  $\text{Ca}^{2+}$  bound.

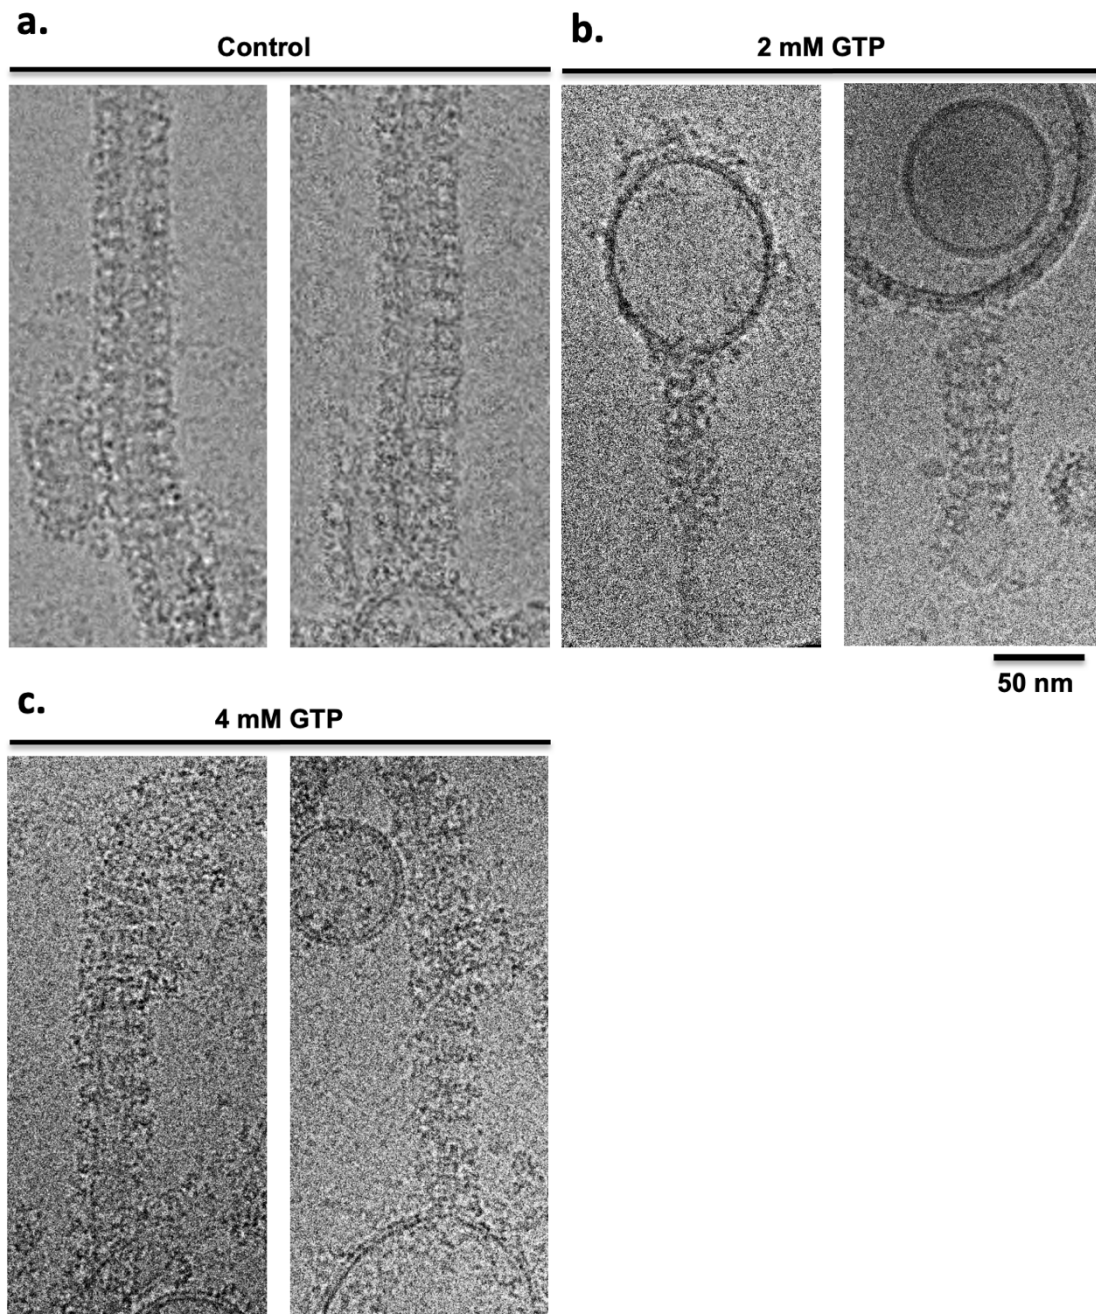

**Figure S4:** Mixing of GTP with dynamin-decorated lipid tubes results in constriction. Representative cryo-electron micrographs of control dynamin-decorated tubes without GTP (a), with 2 mM GTP (b) and 4mM GTP (c).

428 **Acknowledgements**

429 We are grateful to the staff of the Simons Electron Microscopy Center at the New York  
430 Structural Biology Center for help and technical support. We thank Israel Fernandez and  
431 Bridget Huang for kindly providing the ribosome subunits. We thank H. He (NIDDK, NIH)  
432 for cryo-EM data collection, NIDDK EM Core Facility, and the Hinshaw lab for critical  
433 comments. The work presented here was conducted at the National Resource for  
434 Automated Molecular Microscopy located at the New York Structural Biology Center,  
435 supported by grants from the NIH (GM103310, OD019994) and the Simons Foundation  
436 (SF349247) and the NIDDK NIH Intramural Research Program. Other grant support  
437 includes NIH/NIGMS R35 GM118130 (to S.A.D) and NIH/RO1GM088352 (to C.M.N.).  
438

439

440 **Data Availability Statement**

441 The data that support the findings of this study are available from the corresponding  
442 author upon request.

443

444 **Competing Interests Declaration**

445 B.C./C.S.P. have a commercial relationship with STPL, a company that produces a  
446 commercially available instrument, Chameleon, that is based on the Spotiton prototype.

## 447 References

- 448  
449 1 Frank, J. Time-resolved cryo-electron microscopy: Recent progress. *J Struct Biol* **200**,  
450 303-306, doi:10.1016/j.jsb.2017.06.005 (2017).
- 451 2 Mulder, A. M. *et al.* Visualizing ribosome biogenesis: parallel assembly pathways for the  
452 30S subunit. *Science* **330**, 673-677, doi:10.1126/science.1193220 (2010).
- 453 3 Sashital, D. G. *et al.* A combined quantitative mass spectrometry and electron  
454 microscopy analysis of ribosomal 30S subunit assembly in *E. coli*. *eLife* **3**,  
455 doi:10.7554/eLife.04491 (2014).
- 456 4 Berriman, J. & Unwin, N. Analysis of transient structures by cryo-microscopy combined  
457 with rapid mixing of spray droplets. *Ultramicroscopy* **56**, 241-252, doi:10.1016/0304-  
458 3991(94)90012-4 (1994).
- 459 5 Unwin, N. Acetylcholine receptor channel imaged in the open state. *Nature* **373**, 37-43,  
460 doi:10.1038/373037a0 (1995).
- 461 6 White, H. D., Walker, M. L. & Trinick, J. A computer-controlled spraying-freezing  
462 apparatus for millisecond time-resolution electron cryomicroscopy. *J Struct Biol* **121**,  
463 306-313, doi:10.1006/jsbi.1998.3968 (1998).
- 464 7 Unwin, N. & Fujiyoshi, Y. Gating movement of acetylcholine receptor caught by plunge-  
465 freezing. *J Mol Biol* **422**, 617-634, doi:10.1016/j.jmb.2012.07.010 (2012).
- 466 8 Subramaniam, S. & Henderson, R. Electron crystallography of bacteriorhodopsin with  
467 millisecond time resolution. *J Struct Biol* **128**, 19-25, doi:10.1006/jsbi.1999.4178 (1999).
- 468 9 Lu, Z. *et al.* Gas-Assisted Annular Microsprayer for Sample Preparation for Time-  
469 Resolved Cryo-Electron Microscopy. *J Micromech Microeng* **24**, 115001,  
470 doi:10.1088/0960-1317/24/11/115001 (2014).
- 471 10 Lu, Z. *et al.* Monolithic microfluidic mixing-spraying devices for time-resolved cryo-  
472 electron microscopy. *J Struct Biol* **168**, 388-395, doi:10.1016/j.jsb.2009.08.004 (2009).
- 473 11 White, H. D., Thirumurugan, K., Walker, M. L. & Trinick, J. A second generation  
474 apparatus for time-resolved electron cryo-microscopy using stepper motors and  
475 electrospray. *J Struct Biol* **144**, 246-252, doi:10.1016/j.jsb.2003.09.027 (2003).
- 476 12 Lu, Z. *et al.* Passive Microfluidic device for Sub Millisecond Mixing. *Sens Actuators B*  
477 *Chem* **144**, 301-309, doi:10.1016/j.snb.2009.10.036 (2010).
- 478 13 Shaikh, T. R. *et al.* Initial bridges between two ribosomal subunits are formed within 9.4  
479 milliseconds, as studied by time-resolved cryo-EM. *Proc Natl Acad Sci U S A* **111**, 9822-  
480 9827, doi:10.1073/pnas.1406744111 (2014).
- 481 14 Chen, B. *et al.* Structural dynamics of ribosome subunit association studied by mixing-  
482 spraying time-resolved cryogenic electron microscopy. *Structure* **23**, 1097-1105,  
483 doi:10.1016/j.str.2015.04.007 (2015).
- 484 15 Fu, Z. *et al.* Key Intermediates in Ribosome Recycling Visualized by Time-Resolved  
485 Cryoelectron Microscopy. *Structure* **24**, 2092-2101, doi:10.1016/j.str.2016.09.014  
486 (2016).
- 487 16 Kaledhonkar, S. *et al.* Late steps in bacterial translation initiation visualized using time-  
488 resolved cryo-EM. *Nature* **570**, 400-404, doi:10.1038/s41586-019-1249-5 (2019).
- 489 17 Kontziampasis, D. *et al.* A cryo-EM grid preparation device for time-resolved structural  
490 studies. *IUCrJ* **6**, 1024-1031, doi:10.1107/S2052252519011345 (2019).
- 491 18 Jain, T., Sheehan, P., Crum, J., Carragher, B. & Potter, C. S. Spotiton: a prototype for an  
492 integrated inkjet dispense and vitrification system for cryo-TEM. *J Struct Biol* **179**, 68-75,  
493 doi:10.1016/j.jsb.2012.04.020 (2012).
- 494 19 Dandey, V. P. *et al.* Spotiton: New features and applications. *J Struct Biol* **202**, 161-169,  
495 doi:10.1016/j.jsb.2018.01.002 (2018).

- 496 20 Wei, H. *et al.* Optimizing "self-wicking" nanowire grids. *J Struct Biol* **202**, 170-174,  
497 doi:10.1016/j.jsb.2018.01.001 (2018).
- 498 21 Scapin, G. *et al.* Structure of the insulin receptor-insulin complex by single-particle cryo-  
499 EM analysis. *Nature* **556**, 122-125, doi:10.1038/nature26153 (2018).
- 500 22 Xu, K. *et al.* Epitope-based vaccine design yields fusion peptide-directed antibodies that  
501 neutralize diverse strains of HIV-1. *Nat Med* **24**, 857-867, doi:10.1038/s41591-018-0042-  
502 6 (2018).
- 503 23 Zhang, Z. *et al.* Ensemble cryoEM elucidates the mechanism of insulin capture and  
504 degradation by human insulin degrading enzyme. *eLife* **7**, doi:10.7554/eLife.33572  
505 (2018).
- 506 24 Han, H. *et al.* Structure of Vps4 with circular peptides and implications for translocation  
507 of two polypeptide chains by AAA+ ATPases. *eLife* **8**, e44071, doi:10.7554/eLife.44071  
508 (2019).
- 509 25 Koh, F. *et al.* The structure of a 15-stranded actin-like filament from *Clostridium*  
510 *botulinum*. *Nature Communications* **10**, 2856, doi:10.1038/s41467-019-10779-9 (2019).
- 511 26 Liu, Y. *et al.* FACT caught in the act of manipulating the nucleosome. *Nature* **577**, 426-  
512 431, doi:10.1038/s41586-019-1820-0 (2020).
- 513 27 Wu, J. L. Y., Tellkamp, F., Khajepour, M., Robertson, W. D. & Miller, R. J. D. Rapid  
514 mixing of colliding picoliter liquid droplets delivered through-space from piezoelectric-  
515 actuated pipettes characterized by time-resolved fluorescence monitoring. *Rev Sci*  
516 *Instrum* **90**, 055109, doi:10.1063/1.5050270 (2019).
- 517 28 Jiang, Y. *et al.* The open pore conformation of potassium channels. *Nature* **417**, 523-526  
518 (2002).
- 519 29 Jiang, Y. *et al.* Crystal structure and mechanism of a calcium-gated potassium channel.  
520 *Nature* **417**, 515-522 (2002).
- 521 30 Zadek, B. & Nimigean, C. M. Calcium-dependent gating of MthK, a prokaryotic  
522 potassium channel. *J Gen Physiol* **127**, 673-685 (2006).
- 523 31 Ye, S., Li, Y., Chen, L. & Jiang, Y. Crystal structures of a ligand-free MthK gating ring:  
524 insights into the ligand gating mechanism of K<sup>+</sup> channels. *Cell* **126**, 1161-1173 (2006).
- 525 32 Ruff, E. F., Record, M. T., Jr. & Artsimovitch, I. Initial events in bacterial transcription  
526 initiation. *Biomolecules* **5**, 1035-1062, doi:10.3390/biom5021035 (2015).
- 527 33 Mazumder, A. & Kapanidis, A. N. Recent Advances in Understanding sigma70-  
528 Dependent Transcription Initiation Mechanisms. *J Mol Biol* **431**, 3947-3959,  
529 doi:10.1016/j.jmb.2019.04.046 (2019).
- 530 34 Saecker, R. M., Record, M. T., Jr. & Dehaseth, P. L. Mechanism of bacterial  
531 transcription initiation: RNA polymerase - promoter binding, isomerization to initiation-  
532 competent open complexes, and initiation of RNA synthesis. *J Mol Biol* **412**, 754-771,  
533 doi:10.1016/j.jmb.2011.01.018 (2011).
- 534 35 Sundborger, A. C. *et al.* A dynamin mutant defines a superconstricted precession state.  
535 *Cell Rep* **8**, 734-742, doi:10.1016/j.celrep.2014.06.054 (2014).
- 536 36 Kong, L. *et al.* Cryo-EM of the dynamin polymer assembled on lipid membrane. *Nature*  
537 **560**, 258-262, doi:10.1038/s41586-018-0378-6 (2018).
- 538 37 Johansson, M., Bouakaz, E., Lovmar, M. & Ehrenberg, M. The kinetics of ribosomal  
539 peptidyl transfer revisited. *Mol Cell* **30**, 589-598, doi:10.1016/j.molcel.2008.04.010  
540 (2008).
- 541 38 Chen, J. *et al.* *E. coli* TraR allosterically regulates transcription initiation by altering RNA  
542 polymerase conformation. *eLife* **8**, doi:10.7554/eLife.49375 (2019).
- 543 39 Posson, D. J., Rusinova, R., Andersen, O. S. & Nimigean, C. M. Calcium ions open a  
544 selectivity filter gate during activation of the MthK potassium channel. *Nat Commun* **6**,  
545 8342, doi:10.1038/ncomms9342 (2015).

- 546 40 Suloway, C. *et al.* Automated molecular microscopy: the new Legimon system. *J Struct*  
547 *Biol* **151**, 41-60, doi:10.1016/j.jsb.2005.03.010 (2005).
- 548 41 Zheng, S. Q. *et al.* MotionCor2: anisotropic correction of beam-induced motion for  
549 improved cryo-electron microscopy. *Nat Methods* **14**, 331-332, doi:10.1038/nmeth.4193  
550 (2017).
- 551 42 Rohou, A. & Grigorieff, N. CTFFIND4: Fast and accurate defocus estimation from  
552 electron micrographs. *J Struct Biol* **192**, 216-221, doi:10.1016/j.jsb.2015.08.008 (2015).
- 553 43 Sorzano, C. O. *et al.* A clustering approach to multireference alignment of single-particle  
554 projections in electron microscopy. *J Struct Biol* **171**, 197-206,  
555 doi:10.1016/j.jsb.2010.03.011 (2010).
- 556 44 Lander, G. C. *et al.* Appion: an integrated, database-driven pipeline to facilitate EM  
557 image processing. *J Struct Biol* **166**, 95-102 (2009).
- 558 45 Roseman, A. M. FindEM--a fast, efficient program for automatic selection of particles  
559 from electron micrographs. *J Struct Biol* **145**, 91-99, doi:10.1016/j.jsb.2003.11.007  
560 (2004).
- 561 46 Schindelin, J. *et al.* Fiji: an open-source platform for biological-image analysis. *Nat*  
562 *Methods* **9**, 676-682, doi:10.1038/nmeth.2019 (2012).
- 563 47 Fan C., Sukomon N., Flood E., Rheinberger J., Allen T.W., and Nimigean C.M. Ball-and-  
564 chain inactivation in a calcium-gated potassium channel. *Nature*.  
565 <https://doi.org/10.1038/s41586-020-2116-0> (2020)
- 566 48 Scheres SH. A Bayesian view on cryo-EM structure determination. *J Mol Biol.*  
567 2012;415(2):406-18. Epub 2011/11/22. doi: 10.1016/j.jmb.2011.11.010. PubMed PMID:  
568 22100448; PMCID: PMC3314964.
- 569 49 Punjani A, Rubinstein JL, Fleet DJ, Brubaker MA. cryoSPARC: algorithms for rapid  
570 unsupervised cryo-EM structure determination. *Nat Methods*. 2017;14(3):290-6. Epub  
571 2017/02/07. doi: 10.1038/nmeth.4169. PubMed PMID: 28165473.
- 572
- 573
